# Supplementary material
Source: Springer Nature journal article supplement (https://www.springermedizin.de/resource/supplementary/12933_2012_454_MOESM1_ESM.pdf/9538552)

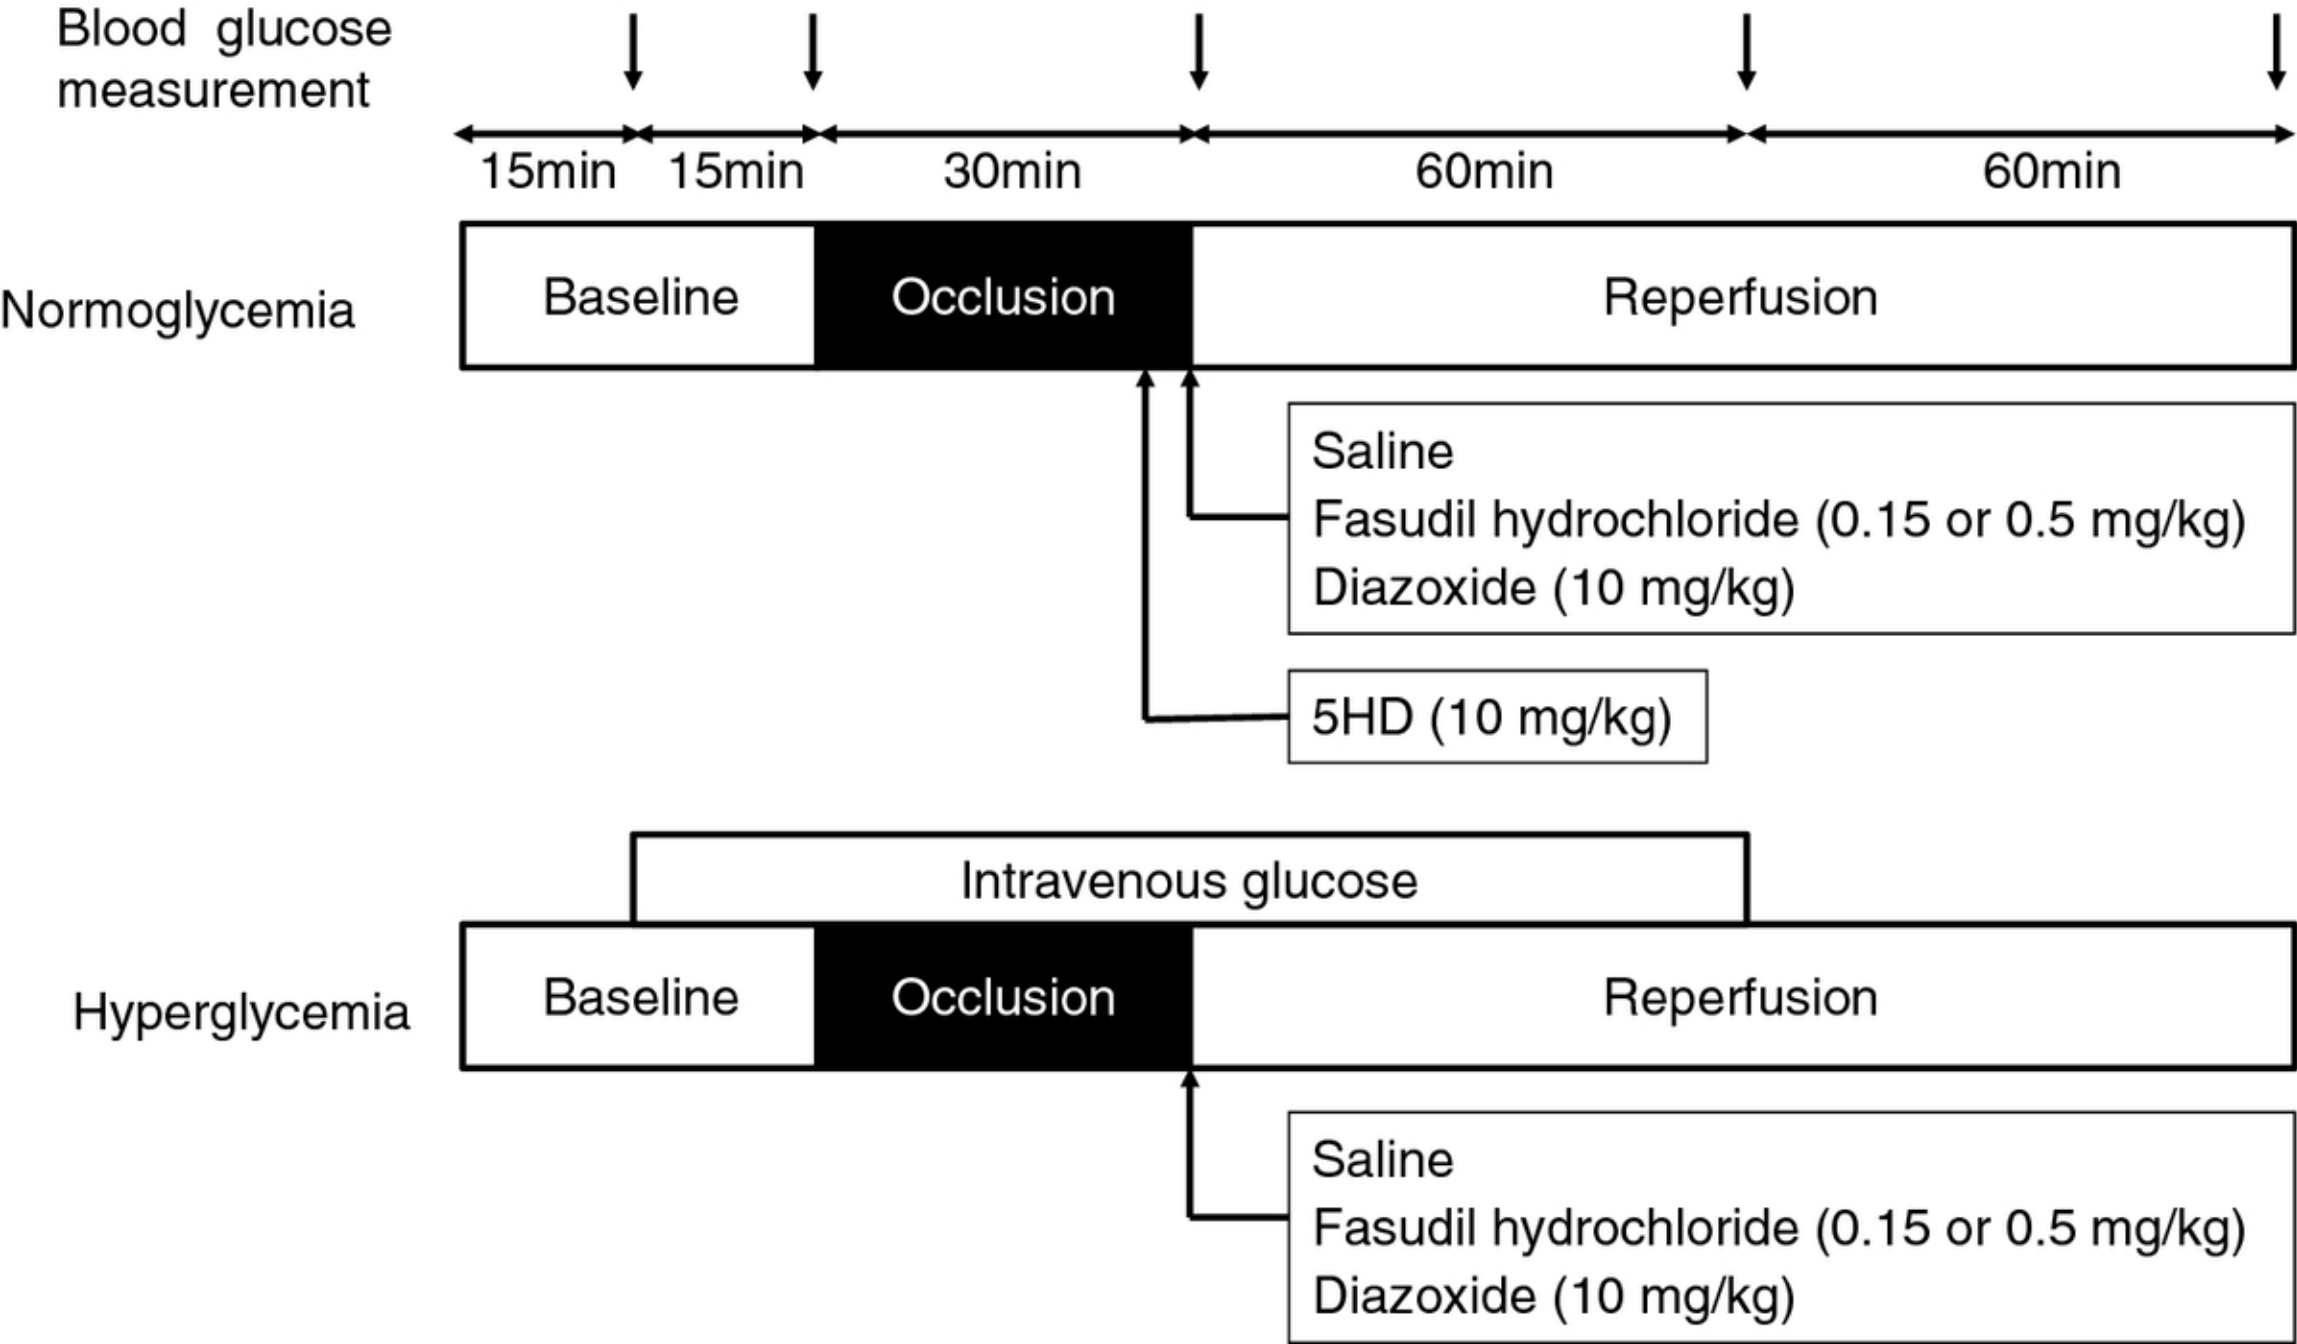

Supplement: MOESM1 [file 9538552]
